# Supplementary material
Source: PubMed Central journal article supplement (PMC3631452)
Supplement: NIHMS445334-supplement-1.pdf [file NIHMS445334-supplement-1.pdf]

*Trypanosoma cruzi* trans-sialidase initiates an ROR- $\gamma$ t-AHR-independent program leading to IL-17 production by activated B cells

Daniela A Bermejo, Shaun W Jackson, Melisa Gorosito-Serran, Eva V Acosta-Rodriguez, Maria C Amezcua-Vesely, Blythe D Sather, Akhilesh K. Singh, Socheath Khim, Juan Mucci, Denny Liggitt, Oscar Campetella, Mohamed Oukka, Adriana Gruppi & David J Rawlings

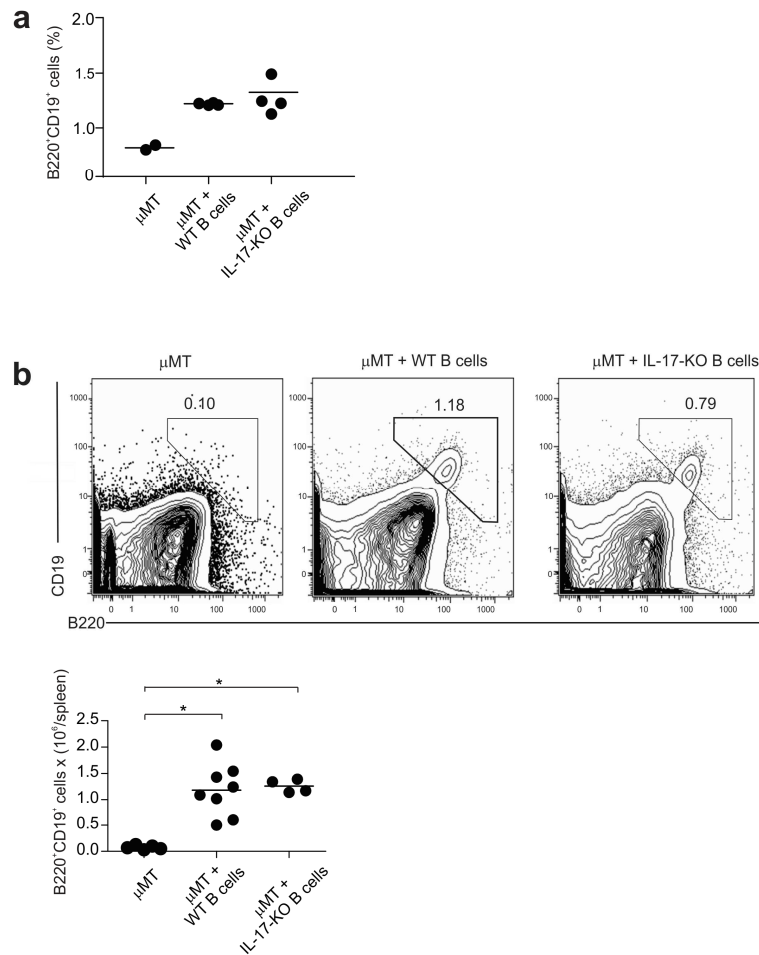

**Supplementary Figure 1. Splenic B cells in  $\mu$ MT mice following adoptive transfer of WT or *Il17a*<sup>-/-</sup> B cells.** Control  $\mu$ MT mice, or  $\mu$ MT mice reconstituted with WT or *Il17a*<sup>-/-</sup> B cells, were infected with *T. cruzi*. **(a)** Percentage of B220<sup>+</sup>CD19<sup>+</sup> cells in peripheral blood of control, or reconstituted,  $\mu$ MT mice at 10 d post-infection. Animals were sacrificed at 20 d and splenic B cell populations were evaluated. **(b)** Representative FACS plots showing splenic B220<sup>+</sup>CD19<sup>+</sup> B cells; and **(c)** Total number of splenic B220<sup>+</sup>CD19<sup>+</sup> B cells. Each symbol denotes a single animal and the line represents the mean value in each group. The reduced total number of control  $\mu$ MT and  $\mu$ MT mice reconstituted with *Il17a*<sup>-/-</sup> B cells reflects increased mortality in these cohorts. Data are shown as means  $\pm$  s.e.m. \*, P = 0.05 (calculated by one-way ANOVA with Bonferroni correction). Data (a-b) are representative of 2 experiments with results in (c) showing combined data from 3-4 animals per group in each experiment.

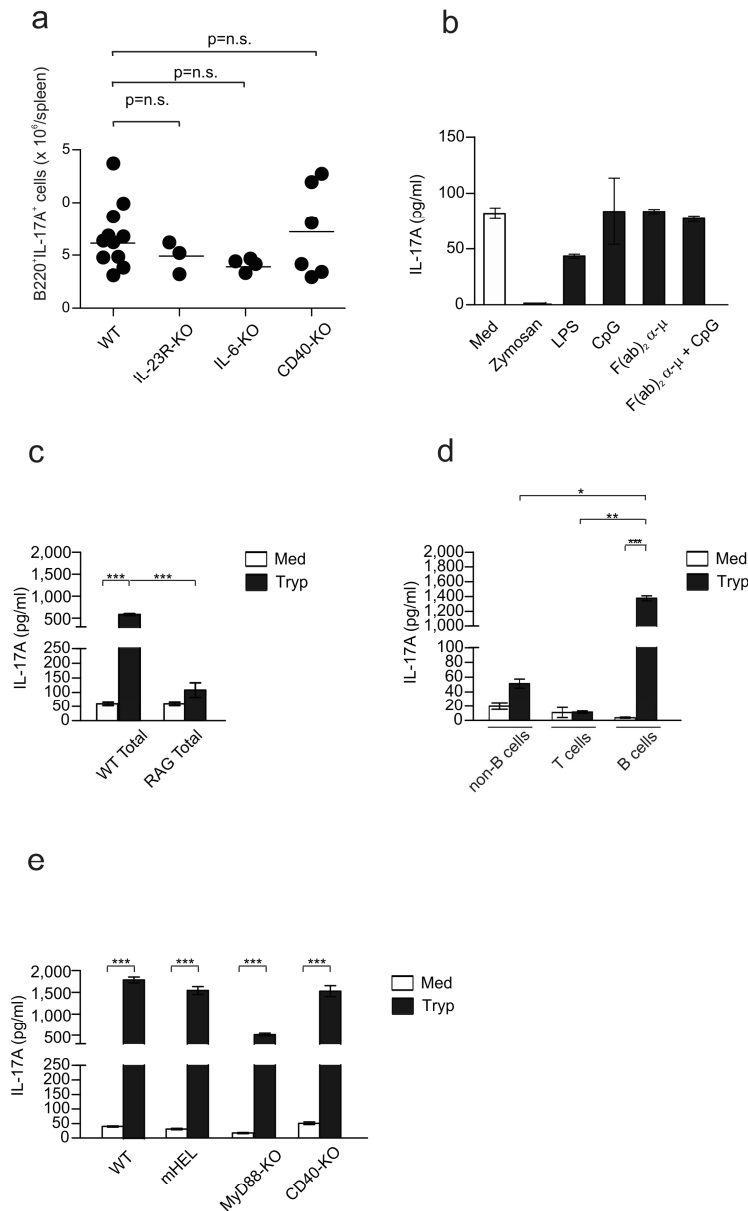

**Supplementary Figure 2. Deletion of IL-23R, IL-6, MyD88 or CD40, or restriction of the BCR repertoire, has no impact on *T. cruzi* triggered IL-17 production.** (a) Number of IL-17A-expressing B220<sup>+</sup> cells in the spleen of WT, *IL23r*<sup>-/-</sup>, *Il6*<sup>-/-</sup> and *Cd40*<sup>-/-</sup> mice infected with *T. cruzi* (10 d). Each symbol denotes a mouse and the line represents the media value with 3-6 animals per group. Results are representative of 2 independent experiments. (b) IL-17A production by purified splenic B220<sup>+</sup>CD19<sup>+</sup> WT B cells stimulated with F(ab)<sub>2</sub> anti-IgM, TLR agonists or both (3 replicates per condition). Representative of 3 experiments. (c) IL-17A production by total splenic cells derived from UI WT and *Rag2*<sup>-/-</sup> mice (3 replicates per condition). Representative of 3 experiments. (d) IL-17A production by Tryp stimulated non-B cells (B220<sup>-</sup> cells) or sort-purified CD3<sup>+</sup> T cells derived from UI WT mice (3 replicates per condition). Representative of 2 experiments. (e) IL-17A production by WT, anti-HEL-Tg, *Myd88*<sup>-/-</sup> or *Cd40*<sup>-/-</sup> B incubated with *T. cruzi* Tryp (3 replicates per condition). Representative of 2 experiments. All analyses performed at 72 h and data are shown as means  $\pm$  s.e.m. \*, P = 0.05 \*\*, P = 0.005 (calculated by Mann-Whitney *U* test).

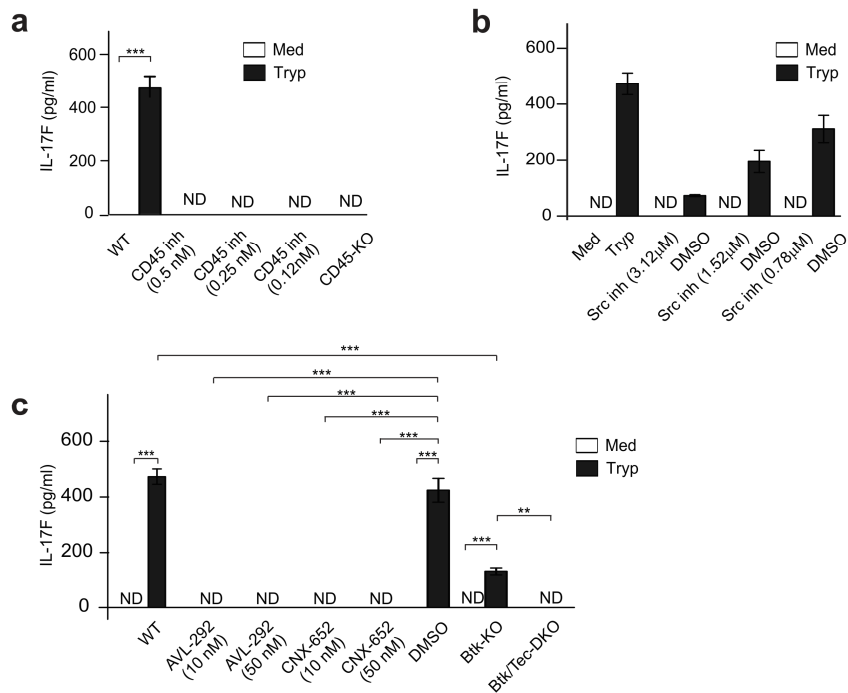

**Supplementary Figure 3. CD45 and Src and Btk family kinases are required for B cell IL-17F production.** (a) IL-17F production by WT B cells treated with or without various doses of CD45 inhibitor and by *Cd45*<sup>-/-</sup> B cells. (b) IL-17F production by WT FM B cells stimulated with Tryp and treated with different concentration of Src inhibitor (PP2) vs. DMSO control. (c) IL-17F production by WT FM B cells stimulated with Tryp and increasing doses of Btk-specific inhibitors (AVL-292 or CNX-652) vs. DMSO control. All analyses performed at 72 h and results are representative of three (a) or two (b-c) independent experiments for each strain or condition. Data are shown as means ± s.e.m. \*\*\*, P = 0.0005 (calculated by one-way ANOVA with Bonferroni correction).

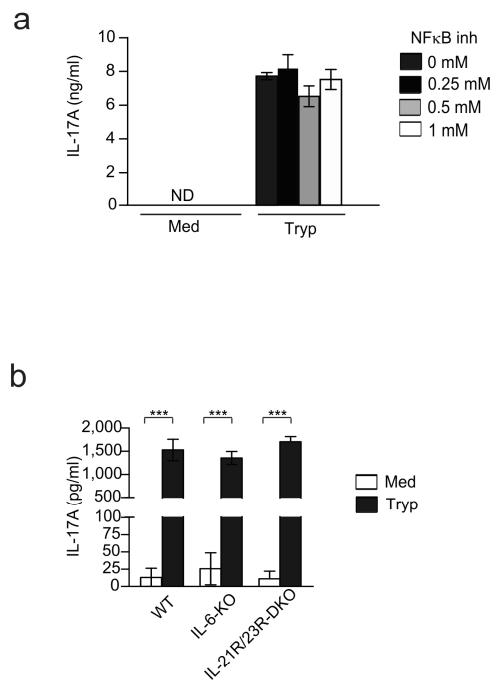

**Supplementary Figure 4. NFκB, IL-6 and IL-21R and -23R signaling are not required for IL-17 production by B cells stimulated with *T. cruzi* Tryps.** (a) IL-17A secretion in B220<sup>+</sup>CD19<sup>+</sup> B cells from WT mice in response to *in vitro* exposure to Tryp and concurrent treatment with different doses of an NF-κB inhibitor (BAY). (b) IL-17A production by B220<sup>+</sup>CD19<sup>+</sup> B cells from WT, *Il6*<sup>-/-</sup> or *Il21*<sup>-/-</sup>*Il23r*<sup>-/-</sup> mice stimulated with Tryp. Data are shown as means ± s.e.m. \*, P = 0.05 \*\*, P = 0.005 (calculated by Mann-Whitney *U* test). All analyses performed at 72 h (3 replicates per condition) and results are representative of two independent experiments.
